1 **Dietary non-starch polysaccharides impair immunity to enteric nematode infection**

2

3 Angela, H. Valente<sup>1#</sup>, Karen M.R. Jensen<sup>1#</sup>, Laura J. Myhill<sup>1</sup>, Ling Zhu<sup>1</sup>, Caroline M.J. Mentzel<sup>1</sup>,  
4 Lukasz Krych<sup>2</sup>, Henrik T. Simonsen<sup>3</sup>, Josue L. Castro-Mejia<sup>2</sup>, Alex Gobbi<sup>4</sup>, Knud Erik Bach Knudsen<sup>5</sup>,  
5 Dennis S. Nielsen<sup>2</sup>, Stig M. Thamsborg<sup>1</sup>, Andrew R. Williams<sup>1\*</sup>

6

7 <sup>#</sup>these authors contributed equally

8

9 <sup>1</sup>Department of Veterinary and Animal Sciences, University of Copenhagen, Frederiksberg,  
10 Denmark

11 <sup>2</sup>Department of Food Science, University of Copenhagen, Frederiksberg, Denmark

12 <sup>3</sup>Department of Biotechnology and Biomedicine, Technical University of Denmark, Kongens  
13 Lyngby, Denmark

14 <sup>4</sup>Department of Plant and Environmental Sciences, University of Copenhagen, Frederiksberg,  
15 Denmark

16 <sup>5</sup>Department of Animal Science, Aarhus University, Tjele, Denmark

17 \*corresponding author – [arw@sund.ku.dk](mailto:arw@sund.ku.dk)

18

19

20

21

22

23

24

25

26

27

28

29

30

31 **Abstract**

32

33 The influence of diet on immune function and resistance to enteric infection and disease is  
34 becoming ever more established. Highly processed, refined diets can lead to inflammation and gut  
35 microbiome dysbiosis, whilst health-promoting dietary components such as phytonutrients and  
36 fermentable fibres are thought to promote a healthy microbiome and balanced mucosal  
37 immunity. Chicory (*Cichorium intybus*) is a leafy green vegetable rich in fibres and bioactive  
38 compounds that may promote gut health. Unexpectedly, we here show that incorporation of  
39 chicory into semisynthetic AIN93G diets renders mice susceptible to infection with enteric  
40 helminths. Mice fed a high level of chicory leaves (10% dry matter) had a more diverse gut  
41 microbiota, but a diminished type-2 immune response to infection with the intestinal roundworm  
42 *Heligmosomoides polygyrus*. Furthermore, the chicory-supplemented diet significantly increased  
43 burdens of the caecum-dwelling whipworm *Trichuris muris*, concomitant with a highly skewed  
44 type-1 immune environment in caecal tissue. The chicory-supplemented diet was rich in non-  
45 starch polysaccharides, particularly uronic acids (the monomeric constituents of pectin). In  
46 accordance, mice fed pectin-supplemented AIN93G diets had higher *T. muris* burdens and reduced  
47 IgE production and expression of genes involved in type-2 immunity. Importantly, treatment of  
48 pectin-fed mice with exogenous IL-25 restored type-2 responses and was sufficient to allow *T.*  
49 *muris* expulsion. Collectively, our data suggest that increasing levels of fermentable, non-starch  
50 polysaccharides in refined diets compromises immunity to helminth infection in mice. This diet-  
51 infection interaction may inform new strategies for manipulating the gut environment to promote  
52 resistance to enteric parasites.

53

54

55

56

57

58

59

60

61

## 62 Introduction

63

64 Diet composition may play a key role in regulation of enteric inflammation and resistance to  
65 infection [1]. The composition of human diets in affluent societies is often unbalanced, with  
66 insufficient vegetables and fruit but a surplus of easily digested carbohydrates such as starch from  
67 processed food; these conditions can drastically influence the composition of the gut microbiota  
68 (GM) [2]. The importance of a diverse and resilient GM for protection against lifestyle and  
69 infectious diseases is well established, and thus dietary components with prebiotic properties may  
70 aid in a healthy gut environment and improve immunity and disease resistance [3].

71

72 Regular consumption of green vegetables has been associated with improved immune function  
73 and less enteric pathogen infection, due to high contents of vitamins, fibres, and bioactive  
74 phytochemicals such as polyphenols [4]. Chicory (*Cichorium intybus*) is a leafy vegetable  
75 widespread across Europe and Asia, where it is grown on an industrial scale, due to its high  
76 content of the fructans (a mix of fructooligosaccharides and inulin) in the roots (up to 40% dry  
77 matter) [5]. Within the plant, the content of nutrients varies considerably; the content of inulin is  
78 negligible in the leaves, but high in the roots [6]. The health-promoting effects of inulin and its  
79 ability to alter GM composition are well known, and consequently, most studies on chicory have  
80 focused on the root part of the plant [7, 8]. However, the leaves are also widely consumed as a  
81 health-promoting food in humans reportedly having hepatoprotective and antidiabetic activity,  
82 and are traditionally used to treat diarrhoea and vomiting [9]. Recently, anti-inflammatory effects  
83 of chicory leaves in several rodent models of autoimmune inflammation have been demonstrated  
84 [10, 11].

85

86 Chicory leaves are both a rich source of fibre, which may act as prebiotic substrate for the GM, and  
87 bioactive secondary metabolites such as sesquiterpene lactones (SL) [12]. In livestock such as pigs,  
88 chicory forage consumption has been associated with higher lactobacilli:coliform ratios, most  
89 likely resulting from increased intake of soluble fibres [13, 14]. Moreover, the high concentrations  
90 of SL and other bioactive phytochemicals may reduce intestinal infections. Parasitic  
91 gastrointestinal worms (helminths) infect more than a billion people worldwide, and are also

92 ubiquitous in livestock, and it is well known that chicory has anti-parasitic properties [15, 16].  
93 Notably, grazing animals fed chicory have less worms [17, 18], an effect that we recently showed  
94 derives from the direct anti-parasitic properties of SL found within the plant [19]. Thus,  
95 nutraceuticals based on chicory leaves may hold great promise for reducing inflammation,  
96 promoting a healthy GM, and limiting enteric pathogens.

97

98 It is becoming increasingly apparent that there is considerable crosstalk between host dietary  
99 components and the intestinal immune system, which may have important implications for host  
100 responses to gut pathogens. Immunity to intestinal helminths is critically dependent on type-2  
101 immune mechanisms such as the release of cytokines (IL-4, IL-13) from Th2 cells and mucus  
102 production in the gut epithelium [20]. Differences in the abundance of macronutrients (e.g.  
103 proteins), fibres, phytochemicals and vitamins may markedly affect the host mucosal response to  
104 infection [21-23]. Given the potential anti-parasitic and anti-inflammatory properties of the  
105 phytochemicals in chicory [24, 25], we hypothesized that consumption of this plant may  
106 significantly alter the host response to infection, thus providing a tractable system for dissecting  
107 the effects of phytonutrient intake on host-parasite interactions. To this end, we developed a  
108 rodent model whereby chicory leaves are incorporated into semisynthetic AIN93G rodent diets  
109 and fed to helminth-infected mice. We aimed to determine if dietary chicory could reduce  
110 helminth infection, and what impact chicory had on anti-helminth immune responses and  
111 infection-induced changes in the GM. We report here that, in contrast to chicory's well known  
112 anti-parasitic properties in livestock, in this model chicory inclusion enhanced enteric helminth  
113 infection. We found that this unexpected result stems from non-starch polysaccharides (NSP)  
114 derived from chicory, which are lower in semisynthetic mouse diets. This increased level of NSP  
115 promoted a type-1 immune environment and susceptibility to infection, which could be reversed  
116 by exogenous administration of a type-2 cytokine. Our findings shed light on the dynamic  
117 interaction between dietary components and host immunity in the context of a pathogenic  
118 infection.

119

120

121

122

## 123 Results

124

125 *Chicory supplementation effects immune responses to Heligmosomoides polygyrus infection, but*  
126 *not parasite burdens*

127

128 To examine in detail how chicory influenced the course of a helminth infection in mice, we fed  
129 mice either an AIN93G control diet, or the AIN93G diet supplemented with either 1% or 10% dried  
130 chicory leaves, during infection with the small intestinal roundworm *Heligmosomoides polygyrus*.  
131 At 14 days post-infection neither faecal egg counts (FEC) or worm burdens were different between  
132 dietary treatment groups ( $p > 0.05$ ; **Figure 1A**). Infection resulted in significant eosinophilia and  
133 goblet and Paneth cell hyperplasia in the jejunum, but these parameters were unaffected by diet  
134 (**Figure 1B**). Thus, in this model dietary chicory did not exert direct anti-parasitic activity, nor  
135 influence the pathological response to infection in the small intestinal mucosa. To investigate  
136 whether chicory may influence the development of adaptive immune responses to infection, we  
137 quantified T-cell profiles in the mesenteric lymph nodes (MLN). *H. polygyrus* infection in mice fed  
138 the AIN93G diet increased the proportion of Th2 (CD4<sup>+</sup>GATA3<sup>+</sup>) T-cells in the MLN ( $p < 0.001$ ) with  
139 no changes in the proportion of Th1 (CD4<sup>+</sup>T-bet<sup>+</sup>) or T-regulatory (CD4<sup>+</sup>Foxp3<sup>+</sup>) T-cells (**Figure 2A**).  
140 Interestingly, we noted that in infected mice fed the 10% chicory diet, there was a substantial  
141 increase ( $p < 0.01$  for interaction between diet and infection) in Th1 cells following infection that  
142 did not occur in the other groups, together with a small, non-significant decrease in Th2 cells  
143 (**Figure 2A**). Thus, the Th2: Th1 ratio in infected mice fed the 10% chicory diet was significantly  
144 skewed towards a Th1 profile compared to control fed-infected mice, which had a highly polarized  
145 Th2 profile characteristic of helminth infection (**Figure 2B**). There was no effect of diet on T-  
146 regulatory cell proportions in either uninfected or *H. polygyrus*-infected mice (**Figure 2A**). To  
147 confirm further the Th1 polarization, we performed qPCR on tissue from the proximal small  
148 intestine to investigate the expression of *Dclk*, *Duox2*, *Ifng*, *Il10*, and *Gpx2*. Gene expression  
149 confirmed the chicory-mediated polarization towards Th1 cells revealed by T-cell phenotyping.  
150 Expression of the tuft cell marker *Dckl1*, which was highly induced by *H. polygyrus* infection, was  
151 significantly suppressed by chicory in a dose-dependent manner (**Figure 2C**). Similarly, infection-

152 induced expression of *Duox2* and *Gpx2* was also attenuated by dietary chicory, albeit not  
153 significant (**Figure 2C**). In contrast, expression of the Th1/Treg related genes *Ifng* and *Il10* was  
154 either unaffected or tended to be increased by chicory supplementation (**Figure 2C**). Collectively,  
155 these data show that chicory did not lower *H. polygyrus* infection, and, in fact, appeared to  
156 promote a Th1 immune response which is normally associated with helminth persistence.

157

158 *Dietary chicory increases diversity and modulates Heligmosomoides polygyrus-induced changes in*  
159 *the gut microbiota*

160

161 Chicory contains a number of putative prebiotic constituents that may modify the host GM [26].  
162 To determine if the chicory-mediated changes in immune function were accompanied by changes  
163 in the GM, caecal digesta samples were analysed by 16S rRNA gene amplicon-based sequencing.  
164 Interestingly, the mice fed the 10% chicory diet had a significantly more diverse GM than the other  
165 groups (**Figure 3A**). Furthermore, samples from the three dietary groups clustered distinctly based  
166 on unweighted UniFrac distance metrics (**Figure 4B**). Samples from mice fed the 10% chicory diet  
167 were most divergent from mice fed the AIN93G control diet, with mice fed the 1% chicory diet  
168 clustering closer with controls (intermediate) (**Figure 3B**;  $p < 0.05$  by PERMANOVA). Uninfected and  
169 *H. polygyrus*-infected mice also clustered into two distinct groups (**Figure 3C**;  $p < 0.05$  by  
170 PERMANOVA). Notably, when plotting Unweighted UniFrac distance metrics based on the 3x2  
171 factorial design showed 6 distinct clusters, indicating profound interactions between the  
172 treatments and indicating that chicory modulated the *H. polygyrus*-induced changes in the GM  
173 (**Figure 3D**).

174

175 ANCOM analysis identified 8 bacterial taxa that were significantly differently distributed between  
176 the groups (**Figure 3E**). Independently of diet, *H. polygyrus* infection decreased the abundance of  
177 *Turicibacter* spp. and increased the abundance of a zOTU (zero-radius Operational Taxonomic  
178 Unit) closely related to *Limosilactobacillus reuteri* (**Figure 3E**). The effects of chicory were markedly  
179 dependent on the inclusion level in the diet. Ten % chicory had profound effects on the relative  
180 abundance of *Coriobacteriacea* and *Clostridia* spp. (both increased) and *Allobaculum* spp.  
181 (decreased), but these effects were not evident with 1% chicory. Significant interactions were

182 observed between diet and infection for the abundances of *Desulfovibrio* spp. and zOTUs closely  
183 related to *Akkermansia muciniphila* and *Bifidobacterium pseudolongum*. Ten % chicory tended to  
184 increase the abundance of *Desulfovibrio* spp. in uninfected mice, but decreased it in infected mice.  
185 The abundance of *A. muciniphila* was increased by infection in control-fed mice and those fed 10%  
186 chicory, but not those fed 1% chicory. Finally, the abundance of *B. pseudolongum* was markedly  
187 increased by 1% chicory, particularly in uninfected mice, but was strongly suppressed by 10%  
188 chicory. Collectively, these data indicate that supplementing an AIN93G diet with 10% chicory  
189 substantially increases the  $\alpha$ -diversity and abundance of specific/several zOTUs, and significantly  
190 modulates *H. polygyrus*-induced changes, in the caecal GM.

191

192 *Dietary chicory increases Trichuris muris* burdens in the caecum and creates a polarized type-1  
193 environment compared to AIN93G diets

194

195 As we observed an effect of chicory on *H. polygyrus*-induced immune responses and GM  
196 composition, but not on worm burdens, we next asked whether chicory may have a stronger  
197 modulatory effect on a caecum-dwelling parasite, at the main site of microbial fermentation in the  
198 gut. As the 10% chicory diet induced the strongest effect on immune function and the GM, we  
199 tested the effect of this diet in mice infected with the whipworm *T. muris*. Mice were trickle-  
200 infected with three doses of 20 *T. muris* eggs, which stimulates a chronic infection in C57BL/6 mice  
201 [27, 28]. Strikingly, five weeks after the commencement of trickle infection, mice fed the chicory-  
202 supplemented diet had significantly higher worm burdens than mice fed the AIN93G diet (**Figure**  
203 **4A**).

204

205 To explore the immunological basis underlying the effect of chicory on *T. muris* burdens, we  
206 performed high-throughput Fluidigm-based qPCR to measure expression of a panel of immune  
207 and mucosal barrier-related genes in caecum tissue of infected mice. Mice fed either AIN93G or  
208 the 10% chicory diet clustered into two distinct groups based on their transcriptional response  
209 (**Figure 4B**). We observed a broad down-regulation of genes involved in Th2 immune function and  
210 mucosal barrier defences, and a strong upregulation of genes involved in Th1 and Th17 immune  
211 function (**Figure 4C**). Genes that were significantly upregulated in the mice fed chicory included

212 *Ifng*, *Nos2* and *Tnf*, whilst downregulated genes involved *Il4*, *Retnlb* and *Defa3* (**Figure 4D**). The  
213 caecal microbiota composition differed between the dietary groups ( $p=0.055$  based on Bray-Curtis  
214 Dissimilarity metrics; **Figure 4E**), but not on unweighted UniFrac distance metrics ( $p=0.25$ ; data not  
215 shown). We noted that, consistent with the experiments in *H. polygyrus*-infected mice, chicory  
216 caused an expansion of *A. muciniphila*, and the *Coriobacteriaceae* family (**Figure 4E**). In contrast to  
217 *H. polygyrus*-infected mice, in this experiment the abundance of *Allobaculum* spp. and zOTUs  
218 corresponding to *B. pseudolongum* were higher in chicory-fed mice. Notably, mice fed the chicory-  
219 supplemented diet had significantly lower levels of *Lactobacillus* spp (**Figure 4E**). Taken together,  
220 these data indicate that inclusion of 10% chicory into a purified diet altered the gut environment  
221 and promoted *T. muris* infection, by inhibition of protective type-2 immune mechanisms.

222

223 *Dietary pectin promotes Trichuris muris infection and impairs type-2 immunity*

224

225 To investigate the underlying cause of the impaired type-2 response and increased *T. muris*  
226 burdens in chicory-fed mice, we first performed a detailed chemical composition of the different  
227 diets. Chemical analysis showed that the diets with chicory inclusion (particularly at 10% inclusion)  
228 were enriched in dietary fibre, especially NSP, compared to the control diet (Table 1). The 10%  
229 chicory diet contained twice the amount of non-cellulosic, NSP as the purified AIN93G diet,  
230 including the presence of arabinose, galactose and uronic acids that were absent in the control  
231 diet. This prompted us to examine the role of NSP in immunity to *T. muris*. Uronic acids are the  
232 monomeric backbone of pectin, a major component of the primary cell walls of plants, and a  
233 prebiotic source of fermentable fibre for the GM [13, 29]. To determine if an increased pectin  
234 content could be responsible for the observed effects on anti-helminth immunity, we fed mice  
235 either an AIN93G diet or the same diet supplemented with 5% pectin during a trickle *T. muris*  
236 infection i.e. 3 doses of 20 eggs weekly. Notably, pectin-fed mice had significantly higher worm  
237 burdens, along with substantially higher serum levels of *T. muris*-specific IgG2a (a marker of a Th1  
238 response; **Figure 5A**). Furthermore, pectin-fed mice had increased levels of *Ifng* and *Nos2*  
239 expression, and decreased levels of *Retnlb* and *Il13* expression, in caecal tissue (**Figure 5B**). Thus,  
240 dietary pectin supplementation closely resembled the observed effects of chicory in impairing  
241 immunity to *T. muris*. To further demonstrate a role for pectin in inhibiting the type-2 response,



242 we fed mice either AIN93G or pectin-supplemented diets and infected them with a single dose of  
243 300 *T. muris* eggs, which typically stimulates a highly skewed type-2 response and worm expulsion  
244 around 21 days post-infection (p.i.) [30]. Indeed, mice fed the AIN93G diet had largely cleared  
245 their infection at day 21 p.i., whereas pectin-fed mice all still harboured worms, indicating  
246 expulsion was incomplete (**Figure 5C**). Consistent with this, levels of *T. muris*-specific IgE were  
247 significantly lower in pectin-fed mice, whereas IgG1 and IgG2a levels were unaffected (**Figure 5D**).  
248 Thus, inclusion of a non-cellulosic NSP source is sufficient to impair type-2 immunity and *T. muris*  
249 expulsion.

250

251 *IL-25 treatment restores immunity to Trichuris muris in pectin-fed mice*

252

253 We postulated that the inclusion of dietary NSP impaired worm expulsion by promoting a type-1  
254 immune response at the expense of type-2 immunity. However, the possibility remained that  
255 chicory or pectin may increase worm burdens by an alternative mechanism, e.g. by acting as an  
256 additional nutrient source for the parasites. We reasoned that if impaired immunity was  
257 responsible, then exogenous addition of a type-2 polarising factor should overcome the dietary  
258 factors to promote expulsion. IL-25 is an alarmin released by epithelial cells during allergies and  
259 helminth infection, which can drive a multi-faceted type-2 response and restore immunity in  
260 susceptible mice (e.g. SCID mice) when administered exogenously [31]. Therefore, mice were fed  
261 pectin-supplemented diets during a high-dose *T. muris* infection, with or without IL-25 treatment.  
262 Consistent with previous data, mice fed an AIN93G diet had cleared the infection at day 21 p.i.,  
263 whereas expulsion was incomplete in pectin-fed mice administered vehicle control (**Figure 6A**).  
264 Importantly, IL-25 treatment completely restored expulsion (**Figure 6A**). Measurement of serum  
265 antibodies showed that rIL-25 treatment boosted IgE responses that were impaired by dietary  
266 pectin (**Figure 6B**), whilst analysis of MLN cells showed that pectin diminished Th2 (GATA3<sup>+</sup>) T-  
267 helper responses, but IL-25 treatment effectively restored a Th2 dominance within the MLN  
268 (**Figure 6C**). Thus, strengthening the host type-2 response was sufficient to abrogate the effect of  
269 the dietary pectin, suggesting that the role of dietary NSP in impairing anti-helminth immunity is  
270 by skewing the type-1/type-2 response in favour of a type-1 environment which promotes worm  
271 survival.

272

273

274

275 **Discussion**

276

277 Bioactive dietary components play a large role in regulating gut health and resistance to enteric  
278 pathogen infections. Our recent work with chicory has identified that SL have a clear anthelmintic  
279 activity, and it is known that SL (especially those derived from chicory) are anti-inflammatory and  
280 antibacterial compounds [32, 33]. Thus, we examined the effects on parasitic infection and gut  
281 microbiota in mice. Unexpectedly, rather than reducing parasite burdens, we found that chicory  
282 increased whipworm infection, and in both *T. muris* and *H. polygyrus* models, inclusion of chicory  
283 in the diet resulted in a significant muting of the helminth type-2 response. Thus, in our mouse  
284 model, it may be possible that an accompanying high fiber content overruled the potential  
285 anthelmintic effects we expected to find due to the SL content of the chicory in the diet.

286 Incorporation of chicory into AIN93G diets was done so as to keep the diets iso-caloric and  
287 balanced for crude protein content, but the diets thus differed in their fibre content, suggesting a  
288 possible mechanism for the observed effects. Whilst cellulose content was higher in the chicory-  
289 supplemented diets, we have previously shown that cellulose content in the diet does not result in  
290 increased *T. muris* infections [30], suggesting that the most likely cause was the increase in non-  
291 cellulosic polysaccharides in the chicory diet; the latter was confirmed by experiments with pure  
292 pectin substituting for chicory. Whilst the difference in non-cellulosic polysaccharide content  
293 between the AIN93G diet and the 10% chicory-supplemented diet was marginal (an increase from  
294 1.8% to 3.6%), it was clearly sufficient to have a strong effect on *T. muris* infection. We cannot rule  
295 out that other NSP sugar residues such as galactose may also play a role in this response, or that  
296 they may be synergistic effects of different NSP within complex plant material in regulating the  
297 response to helminth infection.

298 The exact mechanisms whereby dietary NSP impair type-2 immunity remains to be established,  
299 but it is telling that in *H. polygyrus*-infected mice, high levels of chicory caused increased  $\alpha$ -  
300 diversity in the GM. A species-rich GM may produce a plethora of metabolites that influence the  
301 activity of immune cells [34]. For example, species richness has been correlated with the

302 production of metabolites such as secondary bile acids which promote the production of type-17  
303 cytokines such as IL-22, but may potentially inhibit the expression of type-2 anti-helminth  
304 immunity [35, 36]. Consistent with this hypothesis, germ-free mice have markedly higher Th2  
305 responses than conventional mice and are refractory to infection with *T. muris* and also somewhat  
306 more resistant to *H. polygyrus* [37, 38]. This may suggest that an increasingly rich GM may  
307 progressively shift the mucosal immune response towards more of a type-1 or type-17  
308 environment and downplay Th2 responses. More studies are needed to unravel these  
309 mechanisms.

310 Interestingly, we have recently shown that semisynthetic mouse diets supplemented with pure  
311 inulin, a highly fermentable fructan polymer, also impaired type-2 immune responses to *T. muris*  
312 and prevented worm expulsion [30]. This may suggest that a range of prebiotic substrates,  
313 including both highly refined polymers such as inulin and pectin, and crude plant material such as  
314 chicory leaves, can modulate the response to helminths in a negative way. However, we have also  
315 noted, that including inulin in a large animal model of helminth infection (*Trichuris suis* in pigs) did  
316 not have a type-1 polarizing effect, and in fact tended to promote Th2 responses [39]. The reasons  
317 for these discrepancies between studies have not yet been resolved, but may be related to  
318 differences in diet composition between the semisynthetic nature of compositionally defined  
319 mouse diets and the complex nature of pig diets which moderates the effects of the inulin  
320 inclusion due to a pre-existing and higher level of fermentable fiber in the basal diet. Consistent  
321 with this, it has in some mouse models been shown that colitis can be worsened by inclusion of  
322 high levels of inulin, but only when incorporated into semisynthetic diets and not unrefined mouse  
323 chow [40]. Thus, there appears to be a complex trilateral relationship between diet, the GM and  
324 mucosal immune function during pathogen infection. Elucidating the underlying mechanisms of  
325 this interaction would be highly valuable for the development of targeted nutritional interventions  
326 to fine-tune immune response in the context of different gut infections.

327 In conclusion, we have shown here a novel role for plant NSP in mediating susceptibility to enteric  
328 helminth infection. An increased understanding of the factors underlying this effect of diet may  
329 allow development of new tools to manipulate the gut environment to promote resistance to  
330 enteric pathogens.

331

332

333

334

## 335 **Materials & methods**

336

### 337 *Mice*

338 All animal experimentation was conducted under the guidelines and with approval of the Danish  
339 Animal Experimentation Inspectorate (Licence number 2015-15-0201-00760). In all experiments  
340 female C57BL/6 mice (aged 6-8 weeks; Envigo) were used. Mice were kept in individually-  
341 ventilated cages with sawdust, nesting material and *ad libitum* water and feed. In all experiments,  
342 mice were allowed to adapt to their respective diets for two weeks prior to infection,.

343

### 344 *Parasite Infection, IL-25 treatment, and Necropsy*

345 *H. polygyrus* and *T. muris* were propagated as previous described [30, 41]. For *H. polygyrus*  
346 infection, mice were infected with a single dose of 200 L3 by oral gavage and killed 14 days p.i. For  
347 *T. muris* infection, mice received a trickle infection consisting of 20 eggs by oral gavage at days 0, 7  
348 and 14 before sacrifice at day 35 post first infection dose, or a single dose of 300 eggs followed by  
349 sacrifice at day 21 p.i.. Where indicated, mice received IL-25 treatment during high-dose (300  
350 eggs) *T. muris* infection by i.p. injection of 5 µg rIL-25 (Biolegend #587302), or vehicle control  
351 (PBS), on days 5,8,11,14 and 17 p.i. All mice were sacrificed by cervical dislocation. Immediately  
352 after termination, approximately 0.5 cm of the proximal jejunum and/or caecum was collected  
353 and stored in RNAlater (Sigma-Aldrich). For *H. polygyrus*-infected mice, an additional 1 cm cut  
354 from the proximal end of the jejunum was collected and stored in 10% natural buffered formalin  
355 (4% formaldehyde) for histology, and cell numbers enumerated by a microscopist (blinded to the  
356 treatment groups). Fresh digesta samples were collected from the caecum and snap frozen at -80  
357 °C for GM analyses. Furthermore, the mesenteric lymph nodes (MLN) were collected and stored in  
358 RPMI 1640 media (Sigma-Aldrich). The MLNs were supplemented with 10% fetal calf serum  
359 (Sigma-Aldrich) and stored on ice for flow cytometry (see below). Worm count was performed by

360 manually picking as the mice were euthanized and faeces taken from the colon was stored for egg  
361 count (FEC) by the modified McMaster technique [42].

362

### 363 *Experimental diets*

364 The chicory used for the experimental diets was *C. intybus* cv. “Spadona” (DSV Ltd., Denmark)  
365 sown as a pure sward (7 kg seeds/ha) in May 2019 and harvested mid-June 2019 at the  
366 experimental facilities of the University of Copenhagen (Taastrup, Denmark, 55\_6704800N,  
367 12\_2907500E). Approximately 12 kg of fresh chicory leaves were harvested and dried using a  
368 constant airflow. The dry and ground leaves were incorporated into a purified AIN93G diet at the  
369 expense of starch and casein, with balanced crude protein and metabolisable energy content, and  
370 processed into pellets. The pelleting procedure did not involve heating above 30°C. Three diets  
371 were prepared (Table 1): A control diet (standard AIN93G), and two experimental diets with 1%  
372 and 10% chicory (Table 1). In addition, a diet with 5% citrus peel pectin (Sigma-Aldrich) in place of  
373 starch was also formulated (Table 1) using the same pelleting procedure. All diets were prepared  
374 by Sniff Spezialdiäten GmbH, Germany.

375

### 376 *Flow cytometry*

377 MLNs were processed using a 70 µM cell strainer. The cell suspension was then washed and  
378 suspended at  $5 \times 10^6$  cells/mL. Before staining, cells were washed in cold PBA with 2% FCS, and Fc  
379 receptors were blocked using FC Block (1:100) (BD biosciences # 553141). Cells were then stained  
380 in 96-well round-bottom plates. For extracellular staining, the cells were stained with TCRβ-FITC  
381 (clone H57-597; BD Biosciences) and CD4–PerCP-Cy5.5 (clone R4-5; BD Biosciences). For  
382 intercellular staining, cells were permeabilized using the FoxP3/ transcription factor staining buffer  
383 set (Thermo Fisher) and then incubated with the following antibodies: Tbet-AlexaFluor 647 clone  
384 (4B10; BD Biosciences), GATA3–PE-conjugated (clone TWAJ; ThermoFisher) or FoxP3–FITC  
385 (clone FJK-16s; ThermoFisher). FMO and isotype controls were included. After staining cells were  
386 processed using a BD Accuri C6 flow cytometer (BD Biosciences) and data was acquired and  
387 analysed using Accuri CFlowPlus software (Accuri® Cytometers Inc., MI, USA).

388

389 *16S rRNA gene Amplicon Sequencing*

390 DNA was extracted from caecum digesta using a commercial Bead-Beat Micro AX Gravity kit (A&A  
391 Biotechnology), used in accordance with manufacture's guidelines. Before extraction, samples  
392 were lysed in lysis buffer supplemented with lysozyme (4000 U) and mutanolysin (50 U) and  
393 incubated at 50°C for 20 min. DNA concentration was measured on Varioskan® (Thermo Fisher  
394 Scientific). The V3 region on the 16S rRNA gene was amplified using the universal forward primer  
395 338 F (5'- ACTCTACGGGAGGCAGCAG-3') and reverse primer 518 R (3'- ATTACCGCGGCTGCTGG-5')  
396 (0.5 µL of each/sample, at 10 µM concentration) that included Nextera™ (illumina CA, USA)  
397 compatible overhangs. In addition to this, 5 µL/sample 5x PCR BIO HiFi buffer (PCR Biosystems©,  
398 UK), 0.25 µL/sample PCR BIO HiFi Polymerase (PCR Biosystems ©, UK), and 1 µL/sample BSA buffer  
399 (Sigma) and formamide was added. 17.75 µL DNA was added after being diluted to 1/500 using  
400 sterilized Milli-Q® water, resulting in a total volume of 25 µL. Standard PCR cycling was used: One  
401 initial 95 °C denaturation for 2 minutes followed by 33 cycles of 95 °C for 15 s, 55 °C for 15 s and  
402 72 °C for 20 s, ending with one final elongation step at 72 °C for 4 min. The PCR1 products was  
403 cleaned using magnetic beads on a Biomek 4000 Workstation © (Beckman Coulter, CA, USA). A  
404 second PCR using products from the initial PCR, incorporated standard Nextera Illumina barcodes.  
405 2 µL of initial PCR product plus 4 µL of primer P5 and P7, 5 µL/sample PCR BIO HiFi buffer (PCR  
406 Biosystems©, UK) and 0.25 µL/sample PCR BIO HiFi Polymerase (PCR Biosystems ©, UK) was  
407 pooled to a total volume of 25 µL. One initial 95 °C denaturation for 1 minute was followed by 13  
408 cycles of 95 °C for 15 s, 55 °C for 15 s and 72 °C for 15 s, ending with one final elongation step at  
409 72 °C for 5 min. The concentration was measured with 1x Qubit dsDNA HS assay Kit (Invitrogen,  
410 CA, USA )on Varioskan® (Thermo Fisher Scientific, MA, USA), and finally individual barcodes was  
411 added to the samples, before sequencing.

412

413 *Microbiota analysis*

414 Quality-control of reads, de-replicating, purging from chimeric reads and constructing zero-radius  
415 Operational Taxonomic Units (zOTU) was conducted with the UNOISE pipeline [43] and  
416 taxonomically assigned with Syntax [44]. Taxonomical assignments were obtained using the  
417 Greengenes (13.8) 16S rRNA gene database. Permutational multivariate ANOVA (PERMANOVA)

418 was used to evaluate group differences based on weighted and unweighted UniFrac distance  
419 matrices, or Bray-Curtis dissimilarity metrics, and taxa-level differences were assessed analysis of  
420 composition of microbes (ANCOM). Principal Coordinates Analysis (PCoA) was performed on  
421 unwehghted UniFrac or Bray-Curtis distances.

422

#### 423 *RNA extraction and quantitative PCR*

424 RNA was extracted using a commercial miRNAeasy Mini Kit (Qiagen) following the manufacture's  
425 guidelines. Briefly, tissue was homogenized in Qiazol lysis reagent using a gentleMACS Dissociator  
426 (Miltenyi Biotec, Germany) and filtered in an RNAeasy spin column (Qiagen) including on-column  
427 DNAase treatment. Afterwards, concentration and purity were measured using a NanoDrop ND-  
428 1000 spectrophotometer (NanoDrop Technologies, DE, USA). First-strand cDNA, including gDNA  
429 removal, was synthesized using a commercial QuantiTect Reverse Transcription Kit (Qiagen)  
430 according to the manufacturer's instructions. Quantitative PCR was performed using PerfeCTa  
431 SYBR Green Fastmix (Quantabio) on a AriaMx Real-time PCR System (Agilent, US under the  
432 following conditions: 2 min at 95 °C followed by 40 cycles of 5 sec at 95 °C and 20 sec at 60 °C, and  
433 finished with 30 sec at 95 °C, 30 sec at 65 °C and 30 sec of 95 °C again. The primers used were  
434 *Dckl1*, *Duox2*, *Gpx2*, *Ifng*, *Il10* and *Gapdh* as reference gene (see Supplementary Table 1 for primer  
435 sequences). The  $\Delta\Delta$ CT method was used to calculate fold changes.

436

#### 437 *Fluidigm Analysis*

438 A dynamic in-house gut-immunity panel based on genes involved in immunity, gut microbiota  
439 signaling and gut barrier functions was used with few modifications from a previous publication  
440 [45]. Primers were designed to span an intron if possible and yield products around 75-200  
441 nucleotides long using primer 3 (<http://bioinfo.ut.ee/primer3/>) or primer blast  
442 (<https://www.ncbi.nlm.nih.gov/tools/primer-blast/>) with standard settings [46, 47]. Primer  
443 sequences are listed in Supplementary Table 2. qPCR was performed using the Biomark HD  
444 system (Fluidigm Corporation) on a 96.96 IFC using manufacturer's instructions. The pre-  
445 amplification (TaqMan PreAmp, Thermo Fisher Scientific) and the following Exonuclease 1 (NEB  
446 Biolabs) treatment were performed on 8x diluted cDNA for 17 cycles using a 250 nM pool of the  
447 selected primers. Pre-amplified and exonuclease treated cDNA was diluted 8x before qPCR.

448 Melting curve was assessed in the associated software for multiple peaks and the –RT sample was  
449 checked for gDNA background. One primer assay (MVP1) was included as an extra check for gDNA  
450 contamination [48]. Primer efficiency was calculated from a calibration curve made from a 5x  
451 dilution row of a pool of undiluted pre-amplified and exonuclease treated cDNA. Primer assays  
452 with efficiencies between 80-110 % and  $R^2 > 0,98$  were accepted for further analysis. All Fluidigm  
453 qPCR data processing was performed in Genex6 (multiD Analysis AB). 69 candidate genes and 8  
454 reference genes were assessed. The reference genes were analyzed for stable expression using the  
455 geNorm and NormFinder algorithms [49, 50]. *Actb*, *Sdha*, *Tbp* and *Ywhaz* were most stable and  
456 used as reference genes. Candidate gene expression in cycle of quantification values (Cq) were  
457 normalized to the reference genes, cDNA duplicates were averaged, relative expression of the  
458 lowest expressed were set to 1 and the data were log2 transformed before statistical analysis.

459

#### 460 *ELISA*

461 *T. muris*-specific IgG1, IgG2a and IgE were measured using excretory/secretory antigens and anti-  
462 mouse monoclonal antibodies as previously described [30].

463

#### 464 *Carbohydrate analyses*

465 Contents of sugars (glucose, fructose, sucrose), fructans, starch, soluble and insoluble non-  
466 cellulosic polysaccharides, cellulose, total non-starch polysaccharides, and Klason lignin in the  
467 different diets were determined by enzymatic-colorimetric and enzymatic-chemical-gravimetric  
468 methods as previously described [51].

469

#### 470 *Statistical analysis*

471 Data were analysed using ANOVA or t-tests, or Kruskal-Wallis or Mann-Whitney tests for non-  
472 parametric data. Shapiro-Wilk and Kolmogorov-Smirnov tests were used to tests for assumptions  
473 of normality in analyses. Data were analyzed using GraphPad Prism 8.3 (GraphPad Software Inc.,  
474 USA), and significance taken at  $p < 0.05$ .

475



476 **Acknowledgements**

477 The authors are grateful to Lise-Lotte Christiansen, Mette Schjelde and Denitsa Stefanova for  
478 technical assistance, Sophie Stolzenbach for help with DNA extraction, and Dr Sebastian Rausch  
479 (Freie Universitat Berlin) and Professor Rick Maizels (University of Glasgow) for provision of *H.*  
480 *polygyrus* larvae and advice and discussions. This work was funded by the Danish Council for  
481 Independent Research (Grant 4184-00377).

482 **Data Availability Statement**

483 Sequence data has been uploaded to NCBI (SRA Bioproject) with the accession number  
484 PRJNA821694.

485

486

487

488

489

490

491

492

493

494

495

496

497

498

499

500

501

502 **Table 1.** Composition of Experimental Diets

503

|                                           | AIN93G | 1% chicory | 10% chicory | 5% Pectin |
|-------------------------------------------|--------|------------|-------------|-----------|
| <b>Ingredients (g/100g)</b>               |        |            |             |           |
| Casein                                    | 20     | 19.9       | 18.96       | 20        |
| L-cysteine                                | 0.3    | 0.3        | 0.3         | 0.3       |
| Corn Starch                               | 39.75  | 38.83      | 30.75       | 34.75     |
| Maltodextrin                              | 13.2   | 13.2       | 13.2        | 13.2      |
| Sucrose                                   | 10     | 10         | 10          | 10        |
| Cellulose                                 | 5      | 5          | 5           | 5         |
| Chicory Leaves <sup>1</sup>               | 0      | 1          | 10          | 0         |
| Pectin <sup>2</sup>                       | 0      | 0          | 0           | 5         |
| Vitamin premix                            | 1      | 1          | 1           | 1         |
| Mineral premix                            | 3.5    | 3.5        | 3.5         | 3.5       |
| Choline bitartrate                        | 0.25   | 0.25       | 0.25        | 0.25      |
| TBHQ                                      | 0.0014 | 0.0014     | 0.0014      | 0.0014    |
| Soybean Oil                               | 7      | 7          | 7           | 7         |
| <b>Calculated Composition (%)</b>         |        |            |             |           |
| Crude Protein                             | 17.6   | 17.6       | 17.6        | 17.6      |
| Crude Fat                                 | 7.1    | 7.1        | 7.1         | 7.1       |
| <b>Energy (MJ ME/kg)</b>                  | 16.2   | 16.2       | 15.8        | 15.6      |
| <b>Analyzed Composition (%)</b>           |        |            |             |           |
| Glucose and Fructose                      | 0.05   | 0.1        | 0.55        | ND        |
| Sucrose                                   | 13.28  | 13.17      | 14          | ND        |
| Fructans                                  | 0      | 0          | 0           | ND        |
| Starch                                    | 54.85  | 51.37      | 47.64       | ND        |
| <b>Non-cellulosic polysaccharides (%)</b> |        |            |             |           |
| Rhamnose                                  | 0      | 0          | 0           | ND        |
| Fucose                                    | 0      | 0          | 0           | ND        |
| Arabinose                                 | 0      | 0          | 0.2         | ND        |
| Xylose                                    | 1.1    | 1.0        | 1.2         | ND        |
| Mannose                                   | 0.1    | 0.1        | 0.2         | ND        |
| Galactose                                 | 0      | 0          | 0.3         | ND        |
| Glucose                                   | 0.4    | 0.5        | 0.4         | ND        |
| Uronic Acids                              | 0      | 0.2        | 1.2         | ND        |
| Total Non-cellulosic polysaccharides      | 1.6    | 1.8        | 3.5         | ND        |
| Cellulose                                 | 3.7    | 3.6        | 4.7         | ND        |
| Lignin                                    | 0.3    | 0.3        | 0.3         | ND        |
| <b>Total dietary fibre (%)</b>            | 5.6    | 5.7        | 8.5         | ND        |

504

505 **Figure Legends**

506

507 **Figure 1 – Dietary chicory does not affect *Heligmosomoides polygyrus* burdens or histopathological**  
508 **responses**

509 **A)** *H. polygyrus* worm burdens and faecal egg counts 14 days post-infection, in mice fed either control  
510 AIN93G diets or the control diet supplemented with chicory (1% or 10% dry matter). **B)** Eosinophil, goblet  
511 cell and Paneth cell responses in jejunal tissue (cells/mm<sup>2</sup> tissue).  
512 n= 6 per group, \**p*<0.05 by ANOVA.

513

514 **Figure 2 – Chicory modulates the immune response to *Heligmosomoides polygyrus* infection**

515 **A)** Percentage of CD4<sup>+</sup>Tbet<sup>+</sup> CD4<sup>+</sup>GATA3<sup>+</sup> and CD4<sup>+</sup>Foxp3<sup>+</sup> T-cells in the mesenteric lymph nodes 14 days  
516 post-infection in mice fed either control AIN93G diets or the control diet supplemented with chicory (1% or  
517 10% dry matter). **B)** ratio of CD4<sup>+</sup>GATA3<sup>+</sup>/CD4<sup>+</sup>Tbet<sup>+</sup> T-cells in lymph nodes. **C)** Expression of selected genes  
518 in jejunum tissue. \**p*<0.05; \*\*\**p*<0.001 by ANOVA, n=5-6 per group.

519

520 **Figure 3 – Effects of chicory and *Heligmosomoides polygyrus* infection on composition of the cecal**

521 **microbiota (A)** α-diversity box plots showing higher diversity in mice fed 10% chicory. **(B-D)** β-diversity by  
522 unweighted UniFrac showing a divergence in mice with different treatments. **(E)** Abundance of taxa  
523 identified by ANCOM as being significantly impacted by diet and/or infection. Differentially abundant taxa  
524 were further analysed using Kruskal-Wallis testing within each infection group. n=5-6 mice per group. \* *p* <  
525 0.05 by Kruskal Wallis-test.

526

527 **Figure 4 – Dietary chicory increases *Trichuris muris* burdens and alters immune responses and gut**  
528 **microbiota composition**

529 **A)** Worm burdens at day 35 after the start of trickle infection in mice fed either a control AIN93G diet or  
530 the control diet supplemented with 10% chicory. Mice were infected with 20 eggs at day 0, 7 and 14. n=6-7  
531 mice per group, \*\*\*\* *p* < 0.0001 by T-test. **B)** Principal Component Analysis plots showing clustering of  
532 groups based on Fluidigm gene expression analysis. **C)** Heat map of gene expression in caecal tissue. **D)**  
533 Mean relative expression of selected genes in caecal tissue. **E)** Principal Coordinates Analysis plots showing  
534 clustering of groups based on 16S rRNA gene amplicon based sequencing (Bray-Curtis Dissimilarity Metrics)  
535 of caecal microbiota and relative abundance of zOTUs identified as being significantly impacted by diet by  
536 ANCOM analysis (followed by Mann-Whitney testing). n=6 mice per group. \*\* *p* < 0.01 by Mann-Whitney  
537 test.

538

539 **Figure 5 – Dietary pectin increases *Trichuris muris* burdens and impairs type-2 immune responses**

540 **A)** Worm burdens at day 35 after the start of trickle infection and *T. muris*-specific serum antibody levels in  
541 mice fed either a control AIN93G diet or the control diet supplemented with 5% pectin. Mice were infected  
542 with 20 eggs at day 0, 7 and 14. **B)** Expression of selected genes in caecal tissue, shown as fold change, **C)**  
543 Worm burdens, and **D)** antibody responses in mice 21 days post-infection with 300 *T. muris* eggs. n= 8 mice  
544 per group. \*  $p < 0.05$ ; \*\*  $p < 0.01$ ; \*\*\*  $p < 0.001$  0.001 by t-test or Mann-Whitney test.

545

546 **Figure 6 – IL-25 treatment restores *Trichuris muris* expulsion in mice fed pectin**

547 **A)** Worm burdens 21 days post-infection with 300 *T. muris* eggs in mice fed an AIN93G control diet, or the  
548 control diet supplemented with 5% pectin and administered either PBS or rIL-25 every three days from day  
549 5 post-infection to day 18 post-infection, **B)** *T. muris*-specific serum antibody levels and **C)** T-cell  
550 proportions in mesenteric lymph nodes at day 21 post-infection. n = 6 mice per group. \* $p < 0.05$ ; \*\* $p < 0.01$   
551 by one-way ANOVA or Kruskal-Wallis test.

552

553

554

555

556

557

558

559

560

561

562

563

564

565

566

567

568

569

570

## References

571

- 572 1. Brestoff JR, Artis D. Immune regulation of metabolic homeostasis in health and  
573 disease. *Cell*. 2015;161(1):146-60. doi: 10.1016/j.cell.2015.02.022. PubMed PMID:  
574 25815992.
- 575 2. Deehan EC, Walter J. The Fiber Gap and the Disappearing Gut Microbiome:  
576 Implications for Human Nutrition. *Trends Endocrinol Metab*. 2016;27(5):239-42. Epub  
577 2016/04/16. doi: 10.1016/j.tem.2016.03.001. PubMed PMID: 27079516.
- 578 3. Blander JM, Longman RS, Iliiev ID, Sonnenberg GF, Artis D. Regulation of  
579 inflammation by microbiota interactions with the host. *Nat Immunol*. 2017;18(8):851-60.  
580 doi: 10.1038/ni.3780. PubMed PMID: 28722709.
- 581 4. Sudheer S, Gangwar P, Usmani Z, Sharma M, Sharma VK, Sana SS, et al.  
582 Shaping the gut microbiota by bioactive phytochemicals: An emerging approach for the  
583 prevention and treatment of human diseases. *Biochimie*. 2022;193:38-63. Epub 2021/10/25.  
584 doi: 10.1016/j.biochi.2021.10.010. PubMed PMID: 34688789.
- 585 5. Street RA, Sidana J, Prinsloo G. *Cichorium intybus*: Traditional Uses,  
586 Phytochemistry, Pharmacology, and Toxicology. *Evid Based Complement Alternat Med*.  
587 2013;2013:579319. Epub 2014/01/01. doi: 10.1155/2013/579319. PubMed PMID:  
588 24379887; PubMed Central PMCID: PMC3860133.
- 589 6. Fouré M, Dugardin C, Foligné B, Hance P, Cadalen T, Delcourt A, et al.  
590 Chicory Roots for Prebiotics and Appetite Regulation: A Pilot Study in Mice. *J Agric Food*  
591 *Chem*. 2018;66(25):6439-49. Epub 2018/06/07. doi: 10.1021/acs.jafc.8b01055. PubMed  
592 PMID: 29873488.
- 593 7. Mensink MA, Frijlink HW, van der Voort Maarschalk K, Hinrichs WL. Inulin,  
594 a flexible oligosaccharide I: Review of its physicochemical characteristics. *Carbohydr*  
595 *Polym*. 2015;130:405-19. Epub 2015/06/17. doi: 10.1016/j.carbpol.2015.05.026. PubMed  
596 PMID: 26076642.
- 597 8. Roberfroid MB. Introducing inulin-type fructans. *Br J Nutr*. 2005;93 Suppl  
598 1:S13-25. Epub 2005/05/10. doi: 10.1079/bjn20041350. PubMed PMID: 15877886.
- 599 9. Al-Snafi AE, editor Medical importance of *Cichorium intybus* A review 2016.
- 600 10. Lin W, Liu C, Yang H, Wang W, Ling W, Wang D. Chicory, a typical  
601 vegetable in Mediterranean diet, exerts a therapeutic role in established atherosclerosis in  
602 apolipoprotein E-deficient mice. *Molecular Nutrition & Food Research*. 2015;59(9):1803-  
603 13. doi: <https://doi.org/10.1002/mnfr.201400925>.
- 604 11. Shim DW, Han JW, Ji YE, Shin WY, Koppula S, Kim MK, et al. *Cichorium*  
605 *intybus* Linn. Extract Prevents Type 2 Diabetes Through Inhibition of NLRP3  
606 Inflammasome Activation. *J Med Food*. 2016;19(3):310-7. Epub 2016/03/18. doi:  
607 10.1089/jmf.2015.3556. PubMed PMID: 26987023.
- 608 12. Peña-Espinoza M, Valente AH, Thamsborg SM, Simonsen HT, Boas U,  
609 Enemark HL, et al. Antiparasitic activity of chicory (*Cichorium intybus*) and its natural  
610 bioactive compounds in livestock: a review. *Parasites & Vectors*. 2018;11(1):475. doi:  
611 10.1186/s13071-018-3012-4.
- 612 13. Liu H, Ivarsson E, Lundh T, Lindberg J. Chicory (*Cichorium intybus* L.) and  
613 cereals differently affect gut development in broiler chickens and young pigs. *Journal of*

- 614 Animal Science and Biotechnology. 2013;4(1):50. PubMed PMID: doi:10.1186/2049-1891-  
615 4-50.
- 616 14. Ivarsson E, Liu HY, Dicksved J, Roos S, Lindberg JE. Impact of chicory  
617 inclusion in a cereal-based diet on digestibility, organ size and faecal microbiota in growing  
618 pigs. *Animal*. 2012;6(7):1077-85. Epub 2012/10/04. doi: 10.1017/s1751731111002709.  
619 PubMed PMID: 23031467.
- 620 15. Pullan R, Smith J, Jasrasaria R, Brooker S. Global numbers of infection and  
621 disease burden of soil transmitted helminth infections in 2010. *Parasites & Vectors*.  
622 2014;7(1):37. PubMed PMID: doi:10.1186/1756-3305-7-37.
- 623 16. Morgan ER, Aziz N-AA, Blanchard A, Charlier J, Charvet C, Claerebout E, et  
624 al. 100 Questions in Livestock Helminthology Research. *Trends in Parasitology*.  
625 2019;35(1):52-71. doi: 10.1016/j.pt.2018.10.006.
- 626 17. Tzamaloukas O, Athanasiadou S, Kyriazakis I, Huntley JF, Jackson F. The  
627 effect of chicory (*Cichorium intybus*) and sulla (*Hedysarum coronarium*) on larval  
628 development and mucosal cell responses of growing lambs challenged with *Teladorsagia*  
629 *circumcincta*. *Parasitology*. 2006;132(03):419-26. doi: doi:10.1017/S0031182005009194.
- 630 18. Peña-Espinoza M, Thamsborg SM, Desrues O, Hansen TV, Enemark HL.  
631 Anthelmintic effects of forage chicory (*Cichorium intybus*) against gastrointestinal  
632 nematode parasites in experimentally infected cattle. *Parasitology*. 2016;143(10):1279-93.  
633 Epub 2016/05/14. doi: 10.1017/s0031182016000706. PubMed PMID: 27173405; PubMed  
634 Central PMCID: PMC4988272.
- 635 19. Valente AH, de Roode M, Ernst M, Peña-Espinoza M, Bornancin L, Bonde CS,  
636 et al. Identification of compounds responsible for the anthelmintic effects of chicory  
637 (*Cichorium intybus*) by molecular networking and bio-guided fractionation. *Int J Parasitol*  
638 *Drugs Drug Resist*. 2021;15:105-14. Epub 2021/02/23. doi: 10.1016/j.ijpddr.2021.02.002.  
639 PubMed PMID: 33618233; PubMed Central PMCID: PMC7907819.
- 640 20. Sorobetea D, Svensson-Frej M, Grecis R. Immunity to gastrointestinal  
641 nematode infections. *Mucosal Immunol*. 2018;11(2):304-15. Epub 2018/01/04. doi:  
642 10.1038/mi.2017.113. PubMed PMID: 29297502.
- 643 21. Williams AR, Krych L, Fauzan Ahmad H, Nejsun P, Skovgaard K, Nielsen  
644 DS, et al. A polyphenol-enriched diet and *Ascaris suum* infection modulate mucosal  
645 immune responses and gut microbiota composition in pigs. *PLoS One*.  
646 2017;12(10):e0186546. Epub 2017/10/14. doi: 10.1371/journal.pone.0186546. PubMed  
647 PMID: 29028844; PubMed Central PMCID: PMC5640243.
- 648 22. Masuda A, Houdijk JGM, Allen JE, Athanasiadou S. Body Protein Reserves  
649 Sustain Maternal Performance in Early Lactation but Dietary Protein Is Necessary to  
650 Maintain Performance and Immune Responses to *Nippostrongylus brasiliensis* in Lactating  
651 Rats. *J Nutr*. 2018;148(10):1638-46. Epub 2018/09/12. doi: 10.1093/jn/nxy133. PubMed  
652 PMID: 30204917.
- 653 23. Spencer SP, Wilhelm C, Yang Q, Hall JA, Bouladoux N, Boyd A, et al.  
654 Adaptation of innate lymphoid cells to a micronutrient deficiency promotes type 2 barrier  
655 immunity. *Science*. 2014;343(6169):432-7. Epub 2014/01/25. doi:  
656 10.1126/science.1247606. PubMed PMID: 24458645; PubMed Central PMCID:  
657 PMC4313730.

- 658 24. Peña-Espinoza M, Williams AR, Thamsborg SM, Simonsen HT, Enemark HL.  
659 Anthelmintic effects of forage chicory (*Cichorium intybus*) against free-living and parasitic  
660 stages of *Cooperia oncophora*. *Veterinary Parasitology*. 2017;243:204-7. doi:  
661 <https://doi.org/10.1016/j.vetpar.2017.07.008>.
- 662 25. Cavin C, Delannoy M, Malnoe A, Debefve E, Touché A, Courtois D, et al.  
663 Inhibition of the expression and activity of cyclooxygenase-2 by chicory extract.  
664 *Biochemical and biophysical research communications*. 2005;327(3):742-9. Epub  
665 2005/01/15. doi: 10.1016/j.bbrc.2004.12.061. PubMed PMID: 15649409.
- 666 26. Liu H, Ivarsson E, Lundh T, Lindberg JE. Chicory (*Cichorium intybus* L.) and  
667 cereals differently affect gut development in broiler chickens and young pigs. *J Anim Sci*  
668 *Biotechnol*. 2013;4(1):50. Epub 2013/12/18. doi: 10.1186/2049-1891-4-50. PubMed PMID:  
669 24341997; PubMed Central PMCID: PMC3904198.
- 670 27. Houlden A, Hayes KS, Bancroft AJ, Worthington JJ, Wang P, Grecnis RK, et  
671 al. Chronic *Trichuris muris* Infection in C57BL/6 Mice Causes Significant Changes in Host  
672 Microbiota and Metabolome: Effects Reversed by Pathogen Clearance. *PLoS ONE*.  
673 2015;10(5):e0125945. doi: 10.1371/journal.pone.0125945. PubMed PMID: PMC4418675.
- 674 28. Glover M, Colombo SAP, Thornton DJ, Grecnis RK. Trickle infection and  
675 immunity to *Trichuris muris*. *PLoS Pathog*. 2019;15(11):e1007926. Epub 2019/11/16. doi:  
676 10.1371/journal.ppat.1007926. PubMed PMID: 31730667; PubMed Central PMCID:  
677 PMC6881069.
- 678 29. Blanco-Pérez F, Steigerwald H, Schülke S, Vieths S, Toda M, Scheurer S. The  
679 Dietary Fiber Pectin: Health Benefits and Potential for the Treatment of Allergies by  
680 Modulation of Gut Microbiota. *Curr Allergy Asthma Rep*. 2021;21(10):43. Epub  
681 2021/09/11. doi: 10.1007/s11882-021-01020-z. PubMed PMID: 34505973; PubMed Central  
682 PMCID: PMC8433104.
- 683 30. Myhill LJ, Stolzenbach S, Mejer H, Jakobsen SR, Hansen TVA, Andersen D, et  
684 al. Fermentable Dietary Fiber Promotes Helminth Infection and Exacerbates Host  
685 Inflammatory Responses. *J Immunol*. 2020;204(11):3042-55. Epub 2020/04/15. doi:  
686 10.4049/jimmunol.1901149. PubMed PMID: 32284331.
- 687 31. Owyang AM, Zaph C, Wilson EH, Guild KJ, McClanahan T, Miller HR, et al.  
688 Interleukin 25 regulates type 2 cytokine-dependent immunity and limits chronic  
689 inflammation in the gastrointestinal tract. *J Exp Med*. 2006;203(4):843-9. Epub 2006/04/12.  
690 doi: 10.1084/jem.20051496. PubMed PMID: 16606667; PubMed Central PMCID:  
691 PMC1800834.
- 692 32. Paço A, Brás T, Santos JO, Sampaio P, Gomes AC, Duarte MF. Anti-  
693 Inflammatory and Immunoregulatory Action of Sesquiterpene Lactones. *Molecules*.  
694 2022;27(3). doi: 10.3390/molecules27031142.
- 695 33. Matos MS, Anastácio JD, Nunes dos Santos C. Sesquiterpene Lactones:  
696 Promising Natural Compounds to Fight Inflammation. *Pharmaceutics*. 2021;13(7). doi:  
697 10.3390/pharmaceutics13070991.
- 698 34. Alexander M, Turnbaugh PJ. Deconstructing Mechanisms of Diet-Microbiome-  
699 Immune Interactions. *Immunity*. 2020;53(2):264-76. Epub 2020/08/20. doi:  
700 10.1016/j.immuni.2020.07.015. PubMed PMID: 32814025; PubMed Central PMCID:  
701 PMC7441819.



- 702 35. Li S, Bostick JW, Ye J, Qiu J, Zhang B, Urban JF, Jr., et al. Aryl Hydrocarbon  
703 Receptor Signaling Cell Intrinsically Inhibits Intestinal Group 2 Innate Lymphoid Cell  
704 Function. *Immunity*. 2018;49(5):915-28.e5. Epub 2018/11/18. doi:  
705 10.1016/j.immuni.2018.09.015. PubMed PMID: 30446384; PubMed Central PMCID:  
706 PMC6249058.
- 707 36. Fu Z, Dean JW, Xiong L, Dougherty MW, Oliff KN, Chen ZE, et al.  
708 Mitochondrial transcription factor A in ROR $\gamma$ t(+) lymphocytes regulate small intestine  
709 homeostasis and metabolism. *Nat Commun*. 2021;12(1):4462. Epub 2021/07/24. doi:  
710 10.1038/s41467-021-24755-9. PubMed PMID: 34294718; PubMed Central PMCID:  
711 PMC8298438.
- 712 37. White EC, Houlden A, Bancroft AJ, Hayes KS, Goldrick M, Grecis RK, et al.  
713 Manipulation of host and parasite microbiotas: Survival strategies during chronic nematode  
714 infection. *Science Advances*. 2018;4(3):eaap7399. doi: 10.1126/sciadv.aap7399.
- 715 38. Rausch S, Midha A, Kuhring M, Affinass N, Radonic A, Kühl AA, et al.  
716 Parasitic Nematodes Exert Antimicrobial Activity and Benefit From Microbiota-Driven  
717 Support for Host Immune Regulation. *Front Immunol*. 2018;9:2282. Epub 2018/10/24. doi:  
718 10.3389/fimmu.2018.02282. PubMed PMID: 30349532; PubMed Central PMCID:  
719 PMC6186814.
- 720 39. Myhill LJ, Stolzenbach S, Hansen TVA, Skovgaard K, Stensvold CR,  
721 Andersen LOB, et al. Mucosal Barrier and Th2 Immune Responses Are Enhanced by  
722 Dietary Inulin in Pigs Infected With *Trichuris suis*. *Frontiers in Immunology*. 2018;9(2557).  
723 doi: 10.3389/fimmu.2018.02557.
- 724 40. Miles JP, Zou J, Kumar MV, Pellizzon M, Ulman E, Ricci M, et al.  
725 Supplementation of Low- and High-fat Diets with Fermentable Fiber Exacerbates Severity  
726 of DSS-induced Acute Colitis. *Inflamm Bowel Dis*. 2017;23(7):1133-43. Epub 2017/06/08.  
727 doi: 10.1097/mib.0000000000001155. PubMed PMID: 28590342; PubMed Central  
728 PMCID: PMC625497995.
- 729 41. Johnston CJ, Robertson E, Harcus Y, Grainger JR, Coakley G, Smyth DJ, et al.  
730 Cultivation of *Heligmosomoides polygyrus*: an immunomodulatory nematode parasite and  
731 its secreted products. *J Vis Exp*. 2015;(98):e52412. Epub 2015/04/14. doi: 10.3791/52412.  
732 PubMed PMID: 25867600; PubMed Central PMCID: PMC4401400.
- 733 42. Katakam KK, Thamsborg SM, Dalsgaard A, Kyvsgaard NC, Mejer H.  
734 Environmental contamination and transmission of *Ascaris suum* in Danish organic pig  
735 farms. *Parasites & Vectors*. 2016;9(1):80. doi: 10.1186/s13071-016-1349-0.
- 736 43. Edgar RC. Updating the 97% identity threshold for 16S ribosomal RNA OTUs.  
737 *Bioinformatics*. 2018;34(14):2371-5. doi: 10.1093/bioinformatics/bty113.
- 738 44. Edgar RC. SINTAX: a simple non-Bayesian taxonomy classifier for 16S and  
739 ITS sequences. *bioRxiv*. 2016:074161. doi: 10.1101/074161.
- 740 45. Rasmussen TS, Mentzel CMJ, Kot W, Castro-Mejía JL, Zuffa S, Swann JR, et  
741 al. Faecal virome transplantation decreases symptoms of type 2 diabetes and obesity in a  
742 murine model. *Gut*. 2020:gutjnl-2019-320005. doi: 10.1136/gutjnl-2019-320005.
- 743 46. Koressaar T, Remm M. Enhancements and modifications of primer design  
744 program Primer3. *Bioinformatics (Oxford, England)*. 2007;23(10):1289--91. doi:  
745 10.1093/bioinformatics/btm091. PubMed PMID: Koressaar2007.



- 746 47. Ye J, Coulouris G, Zaretskaya I, Cutcutache I, Rozen S, Madden TL. Primer-  
747 BLAST: a tool to design target-specific primers for polymerase chain reaction. *BMC*  
748 *bioinformatics*. 2012;13:134. doi: 10.1186/1471-2105-13-134. PubMed PMID: Ye2012.
- 749 48. Laurell H, Iacovoni JS, Abot A, Svec D, Maoret J-J, Arnal J-F, et al. Correction  
750 of RT-qPCR data for genomic DNA-derived signals with ValidPrime. *Nucleic Acids*  
751 *Research*. 2012;40(7):e51-e. doi: 10.1093/nar/gkr1259.
- 752 49. Vandesompele Ja. Accurate normalization of real-time quantitative RT-PCR  
753 data by geometric averaging of multiple internal control genes. *Genome biology*.  
754 2002;3(7):RESEARCH0034. doi: 10.1186/gb-2002-3-7-research0034. PubMed PMID:  
755 Vandesompele2002.
- 756 50. Andersen CL, Jensen JL, Orntoft TF. Normalization of real-time quantitative  
757 reverse transcription-PCR data: a model-based variance estimation approach to identify  
758 genes suited for normalization, applied to bladder and colon cancer data sets. *Cancer*  
759 *research*. 2004;64(15):5245--50. doi: 10.1158/0008-5472.CAN-04-0496. PubMed PMID:  
760 Andersen2004.
- 761 51. Knudsen KEB. Carbohydrate and lignin contents of plant materials used in  
762 animal feeding. *Animal Feed Science and Technology*. 1997;67(4):319-38. doi:  
763 [https://doi.org/10.1016/S0377-8401\(97\)00009-6](https://doi.org/10.1016/S0377-8401(97)00009-6).
- 764

**A**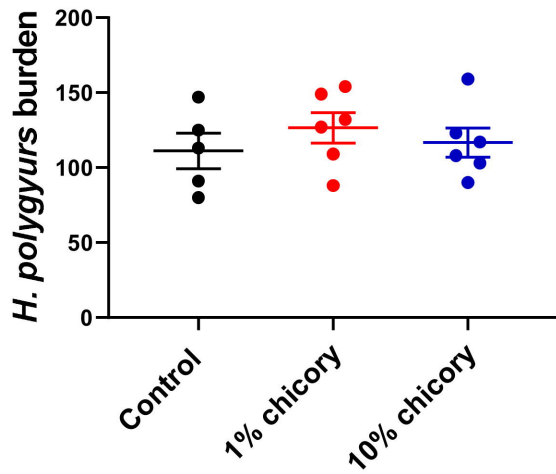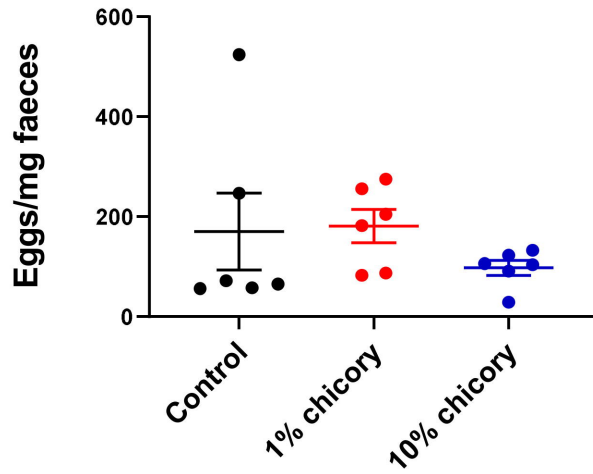**B**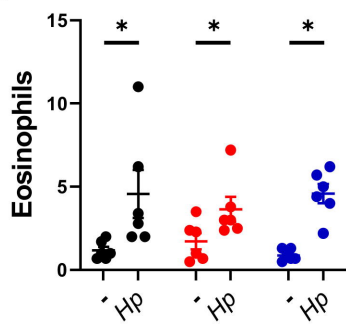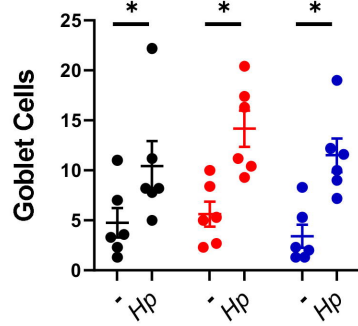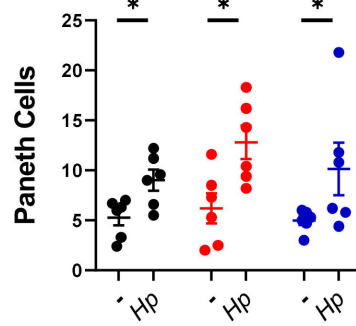

● Control  
● 1% Chicory  
● 10% Chicory

**A**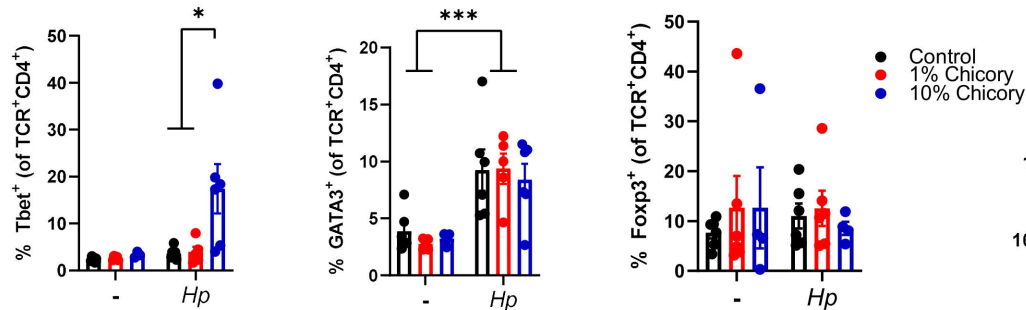**B**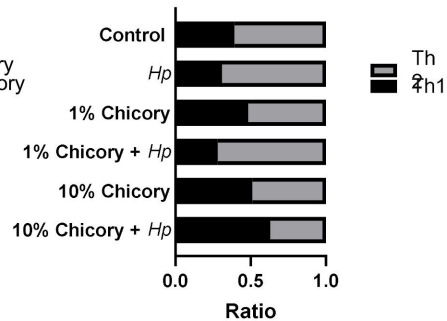**C**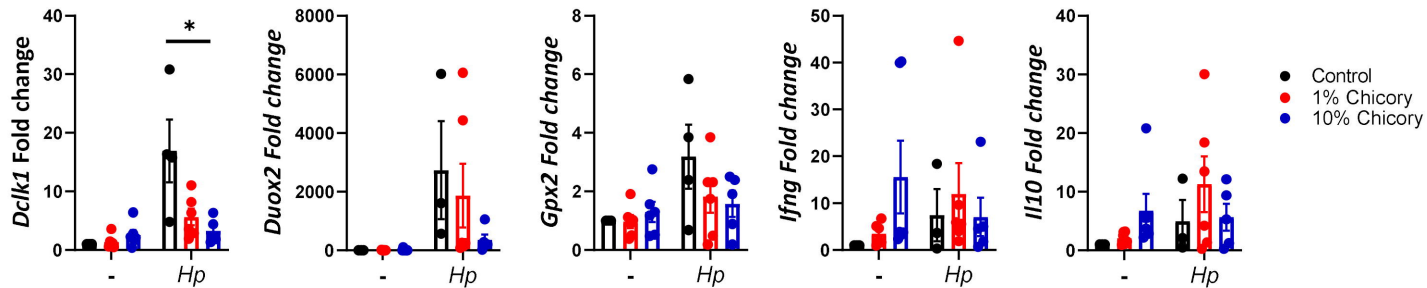



**A**

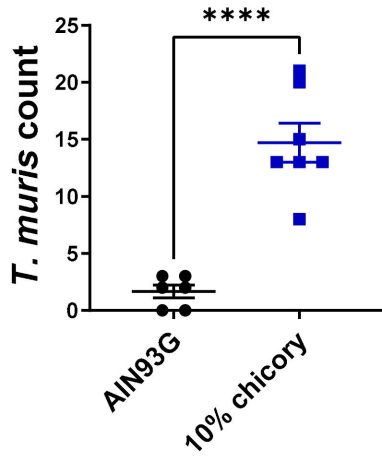

**B**

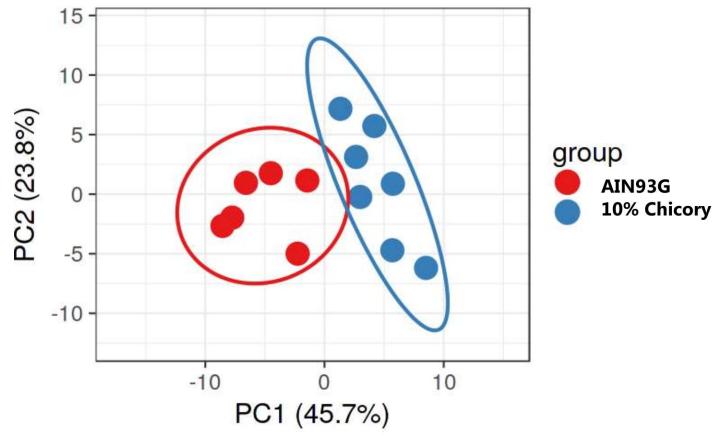

**C**

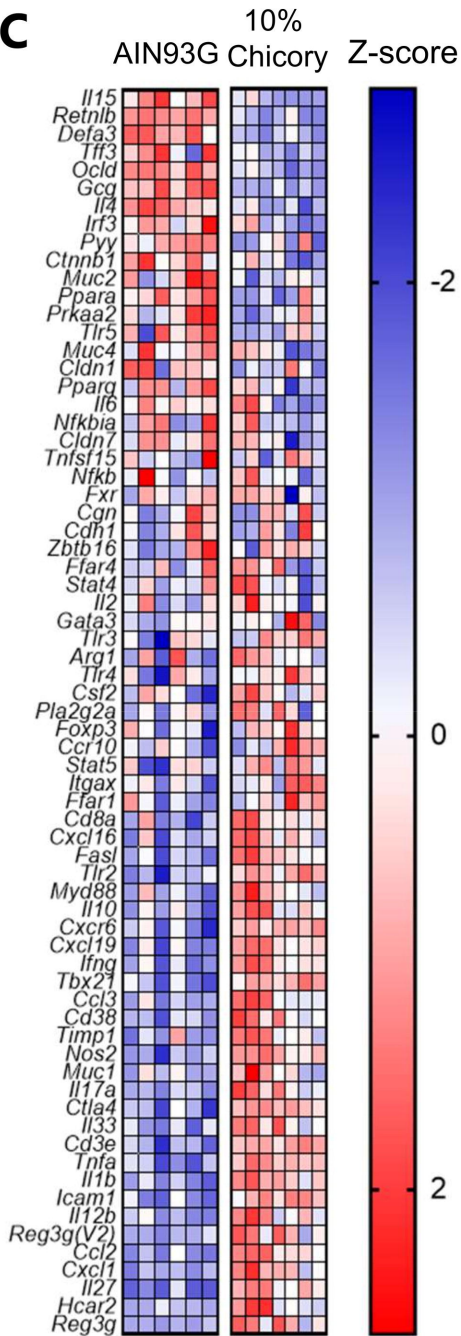

**D**

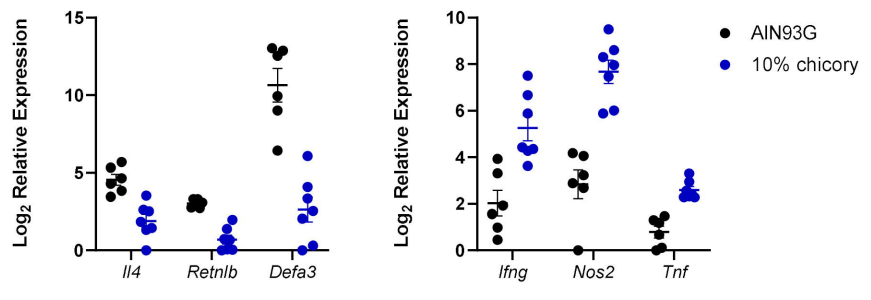

**E**

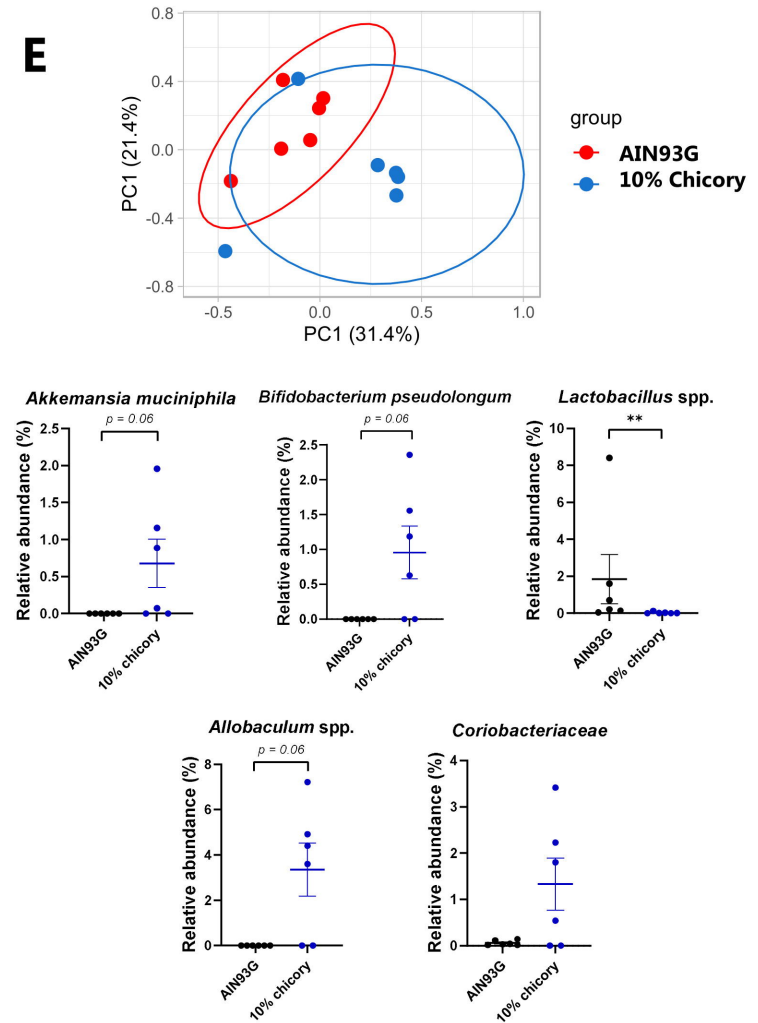

**A**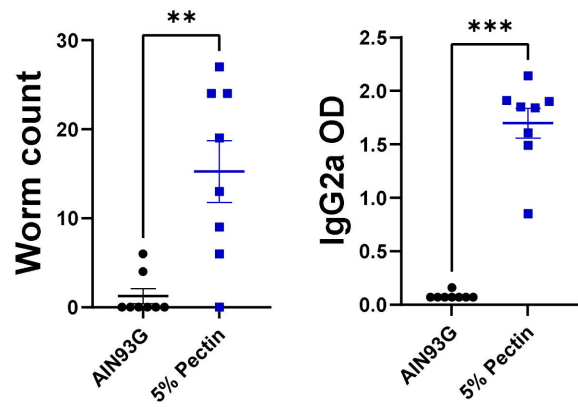**B**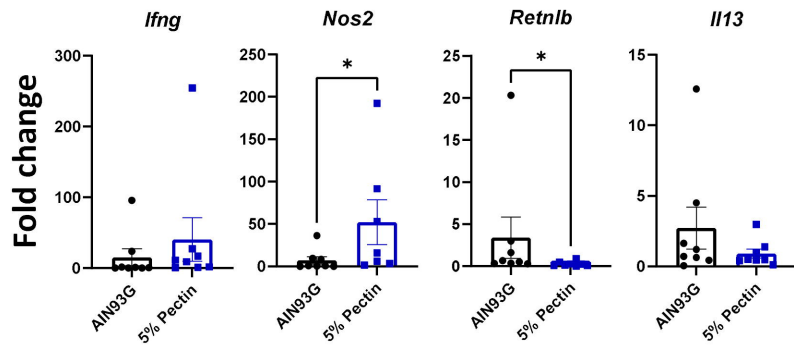**C**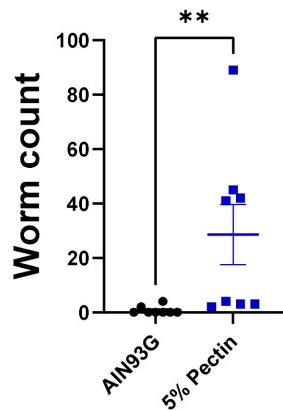**D**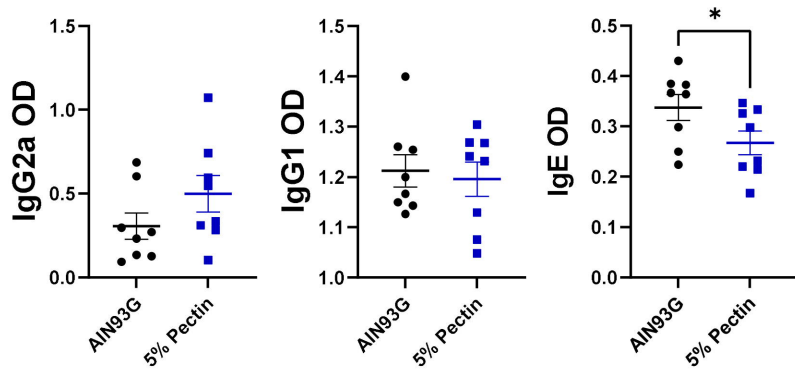

**A**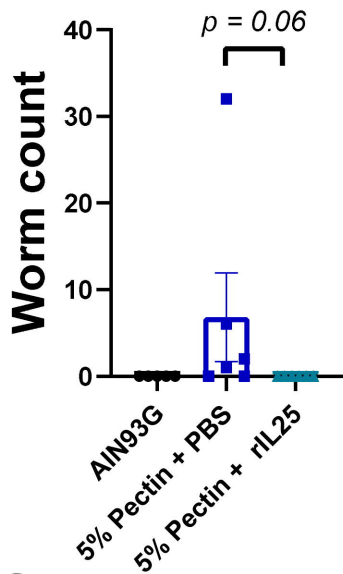**B**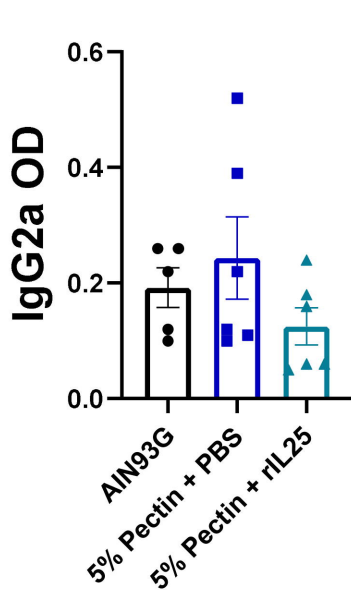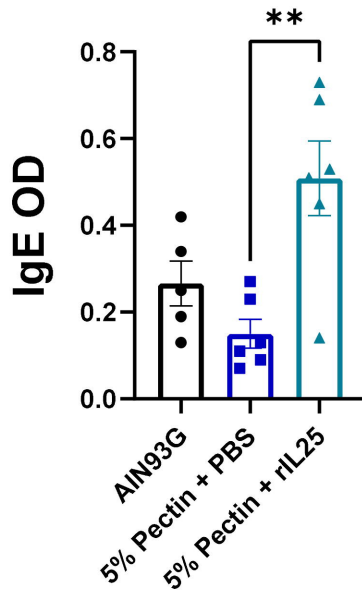**C**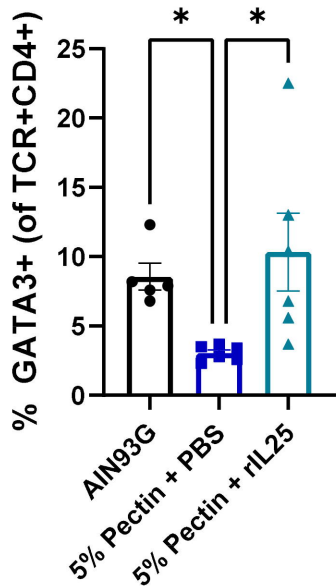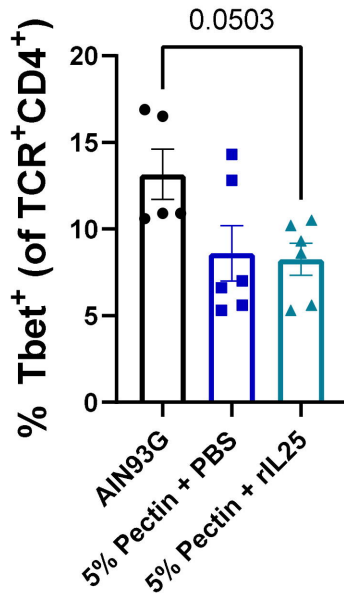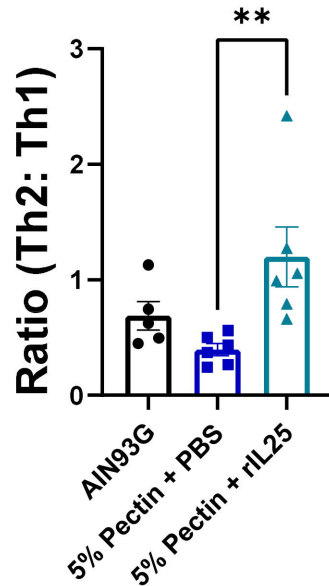

Source: https://www.biorxiv.org/content/10.1101/2022.07.15.500167v1.full.pdf
